# Supplementary material for: Depicting Precise Temperature and Duration of Vernalization and Inhibiting Early Bolting and Flowering of Angelica sinensis by Freezing Storage
Source: Front Plant Sci. 2022 May 19;13:853444. doi: 10.3389/fpls.2022.853444 (PMC9161173; doi:10.3389/fpls.2022.853444)
Supplement: Supplementary file 2 [file Data_Sheet_2.xlsx]

## Sheet: RR and FIR
	－5℃			－3℃			0℃			3℃			5℃
	70d	104d	125d	70d	104d	125d	21d	30d	45d	21d	30d	45d	21d	30d	45d
number of rotten/ frozen injury	13	27	23	13	12	19	0	0	33	0	0	47	0	0	140
number of rotten/ frozen injury	16	22	27	7	18	13	0	0	27	0	0	43	0	0	155
number of rotten/ frozen injury	15	25	25	10	15	15	0	0	30	0	0	45	0	0	150
RR/FIR	4.33333	9	7.66667	4.33333	4	6.33333	0	0	11	0	0	15.6667	0	0	46.6667
RR/FIR	5.33333	7.33333	9	2.33333	6	4.33333	0	0	9	0	0	14.3333	0	0	51.6667
RR/FIR	5	8.33333	8.33333	3.33333	5	5	0	0	10	0	0	15	0	0	50
Mean	4.88889	8.22222	8.33333	3.33333	5	5.22222	0	0	10	0	0	15	0	0	49.4444
Standard	0.509175	0.83887	0.666667	1	1	1.01835	0	0	1	0	0	0.666667	0	0	2.54588

## Sheet: GR
Large
	－5℃			－3℃			0℃			3℃			5℃
	70d	104d	125d	70d	104d	125d	21d	30d	45d	21d	30d	45d	21d	30d	45d
number of transplant	35	54	54	35	54	54	54	54	54	54	54	54	54	54	54
number of transplant	35	54	54	35	54	54	54	54	54	54	54	54	54	54	54
number of transplant	35	54	54	35	54	54	54	54	54	54	54	54	54	54	54
number of germination	31	52	53	34	53	51	41	44	48	40	43	42	37	40	40
number of germination	33	54	50	33	51	54	40	43	47	41	41	43	35	37	38
number of germination	32	53	51	35	54	53	42	42	46	42	42	41	39	38	39
GR	88.5714	96.2963	98.1481	97.1429	98.1481	94.4444	75.9259	81.4815	88.8889	74.0741	79.6296	77.7778	68.5185	74.0741	74.0741
GR	94.2857	100	92.5926	94.2857	94.4444	100	74.0741	79.6296	87.037	75.9259	75.9259	79.6296	64.8148	68.5185	70.3704
GR	91.4286	98.1481	94.4444	100	100	98.1481	77.7778	77.7778	85.1852	77.7778	77.7778	75.9259	72.2222	70.3704	72.2222
Mean	91.4286	98.1481	95.0617	97.1429	97.5309	97.5309	75.9259	79.6296	87.037	75.9259	77.7778	77.7778	68.5185	70.9877	72.2222
Standard	2.85714	1.85185	2.82875	2.85714	2.82875	2.82875	1.85185	1.85185	1.85185	1.85185	1.85185	1.85185	3.7037	2.82875	1.85185
Medium
	－5℃			－3℃			0℃			3℃			5℃
	70d	104d	125d	70d	104d	125d	21d	30d	45d	21d	30d	45d	21d	30d	45d
number of transplant	35	54	54	35	54	54	54	54	54	54	54	54	54	54	54
number of transplant	35	54	54	35	54	54	54	54	54	54	54	54	54	54	54
number of transplant	35	54	54	35	54	54	54	54	54	54	54	54	54	54	54
number of germination	35	50	49	34	54	53	41	43	47	43	40	43	30	37	34
number of germination	34	51	50	35	51	51	44	47	49	42	44	42	27	40	30
number of germination	35	49	50	34	53	52	42	39	46	41	43	44	33	34	38
GR	100	92.5926	90.7407	97.1429	100	98.1481	75.9259	79.6296	87.037	79.6296	74.0741	79.6296	55.5556	68.5185	62.963
GR	97.1429	94.4444	92.5926	100	94.4444	94.4444	81.4815	87.037	90.7407	77.7778	81.4815	77.7778	50	74.0741	55.5556
GR	97.1429	94.4444	92.5926	100	94.4444	94.4444	81.4815	87.037	90.7407	77.7778	81.4815	77.7778	50	74.0741	55.5556
Mean	98.0952	93.8272	91.9753	99.0476	96.2963	95.679	79.6296	84.5679	89.5062	78.3951	79.0123	78.3951	51.8519	72.2222	58.0247
Standard	1.64957	1.06917	1.06917	1.64957	3.2075	2.13833	3.2075	4.27667	2.13833	1.06917	4.27667	1.06917	3.2075	3.2075	4.27667
Small
	－5℃			－3℃			0℃			3℃			5℃
	70d	104d	125d	70d	104d	125d	21d	30d	45d	21d	30d	45d	21d	30d	45d
number of transplant	35	54	54	35	54	54	54	54	54	54	54	54	54	54	54
number of transplant	35	54	54	35	54	54	54	54	54	54	54	54	54	54	54
number of transplant	35	54	54	35	54	54	54	54	54	54	54	54	54	54	54
number of germination	34	53	52	33	54	53	45	50	50	46	47	46	40	42	44
number of germination	34	53	54	35	52	52	44	46	49	44	45	43	32	38	36
number of germination	35	54	50	34	53	54	42	48	48	42	43	45	36	40	40
GR	97.1429	98.1481	96.2963	94.2857	100	98.1481	83.3333	92.5926	92.5926	85.1852	87.037	85.1852	74.0741	77.7778	81.4815
GR	97.1429	98.1481	100	100	96.2963	96.2963	81.4815	85.1852	90.7407	81.4815	83.3333	79.6296	59.2593	70.3704	66.6667
GR	100	100	92.5926	97.1429	98.1481	100	77.7778	88.8889	88.8889	77.7778	79.6296	83.3333	66.6667	74.0741	74.0741
Mean	98.0952	98.7654	96.2963	97.1429	98.1481	98.1481	80.8642	88.8889	90.7407	81.4815	83.3333	82.716	66.6667	74.0741	74.0741
Standard	1.64957	1.06917	3.7037	2.85714	1.85185	1.85185	2.82875	3.7037	1.85185	3.7037	3.7037	2.82875	7.40741	3.7037	7.40741

## Sheet: EBF
Large
	－5℃			－3℃			0℃			3℃			5℃
	70d	104d	125d	70d	104d	125d	21d	30d	45d	21d	30d	45d	21d	30d	45d
number of transplant	35	54	54	35	54	54	54	54	54	54	54	54	54	54	54
number of transplant	35	54	54	35	54	54	54	54	54	54	54	54	54	54	54
number of transplant	35	54	54	35	54	54	54	54	54	54	54	54	54	54	54
number of germination	31	52	53	34	53	51	41	44	48	40	43	42	37	40	40
number of germination	33	54	50	33	51	54	40	43	47	41	41	43	35	37	38
number of germination	32	53	51	35	54	53	42	42	46	42	42	41	39	38	39
number of death	2	3	5	10	3	3	1	4	0	2	2	2	1	0	1
number of death	1	4	3	9	4	4	2	4	1	1	1	1	0	1	0
number of death	3	5	4	11	5	5	2	5	0	1	1	2	0	1	0
number of survival	29	49	48	24	50	48	40	40	48	38	41	40	36	40	39
number of survival	32	50	47	24	47	50	38	39	46	40	40	42	35	36	38
number of survival	29	48	47	24	49	48	40	37	46	41	41	39	39	37	39
number of EBF	2	0	0	3	0	0	5	22	46	2	17	29	2	6	15
number of EBF	4	0	0	4	2	0	6	25	45	4	16	28	2	8	14
number of EBF	3	0	0	5	1	0	5	21	42	5	17	30	4	7	16
EBF rate (%)	6.89655	0	0	12.5	0	0	12.5	55	95.8333	5.26316	41.4634	72.5	5.55556	15	38.4615
EBF rate (%)	12.5	0	0	16.6667	4.25532	0	15.7895	64.1026	97.8261	10	40	66.6667	5.71429	22.2222	36.8421
EBF rate (%)	10.3448	0	0	20.8333	2.04082	0	12.5	56.7568	91.3043	12.1951	41.4634	76.9231	10.2564	18.9189	41.0256
Mean	9.91379	0	0	16.6667	2.09871	0	13.5965	58.6198	94.9879	9.15276	40.9756	72.0299	7.17542	18.7137	38.7764
Standard	2.82648	0	0	4.16667	2.12825	0	1.89918	4.8288	3.34205	3.54279	0.844903	5.14434	2.6694	3.61548	2.10947
Medium
	－5℃			－3℃			0℃			3℃			5℃
	70d	104d	125d	70d	104d	125d	21d	30d	45d	21d	30d	45d	21d	30d	45d
number of transplant	35	54	54	35	54	54	54	54	54	54	54	54	54	54	54
number of transplant	35	54	54	35	54	54	54	54	54	54	54	54	54	54	54
number of transplant	35	54	54	35	54	54	54	54	54	54	54	54	54	54	54
number of germination	35	50	49	34	54	53	41	43	47	43	40	43	30	37	34
number of germination	34	51	50	35	51	51	44	47	49	42	44	42	27	40	30
number of germination	35	49	50	34	53	52	42	39	46	41	43	44	33	34	38
number of death	5	2	3	10	3	2	0	2	2	0	0	3	0	0	0
number of death	4	1	0	8	1	2	0	1	0	0	0	2	1	0	0
number of death	6	3	3	7	2	0	0	3	2	0	0	4	0	0	1
number of survival	30	48	46	24	51	51	41	41	45	43	40	40	30	37	34
number of survival	30	50	50	27	50	49	44	46	49	42	44	40	26	40	30
number of survival	29	46	47	27	51	52	42	36	44	41	43	40	33	34	37
number of EBF	0	0	0	1	0	0	4	17	40	3	11	21	1	4	7
number of EBF	0	0	0	0	0	0	3	16	42	2	12	23	2	3	8
number of EBF	0	0	0	1	0	0	4	17	43	3	12	20	1	3	9
EBF rate (%)	0	0	0	4.16667	0	0	9.7561	41.4634	88.8889	6.97674	27.5	52.5	3.33333	10.8108	20.5882
EBF rate (%)	0	0	0	0	0	0	6.81818	34.7826	85.7143	4.7619	27.2727	57.5	7.69231	7.5	26.6667
EBF rate (%)	0	0	0	3.7037	0	0	9.52381	47.2222	97.7273	7.31707	27.907	50	3.0303	8.82353	24.3243
Mean	0	0	0	2.62346	0	0	8.69936	41.1561	90.7768	6.35191	27.5599	53.3333	4.68531	9.04478	23.8597
Standard	0	0	0	2.28374	0	0	1.63329	6.2255	6.22504	1.38746	0.32134	3.81881	2.60854	1.66646	3.06573
Small
	－5℃			－3℃			0℃			3℃			5℃
	70d	104d	125d	70d	104d	125d	21d	30d	45d	21d	30d	45d	21d	30d	45d
number of transplant	35	54	54	35	54	54	54	54	54	54	54	54	54	54	54
number of transplant	35	54	54	35	54	54	54	54	54	54	54	54	54	54	54
number of transplant	35	54	54	35	54	54	54	54	54	54	54	54	54	54	54
number of germination	34	53	52	33	54	53	45	50	50	46	47	46	40	42	44
number of germination	34	53	54	35	52	52	44	46	49	44	45	43	32	38	36
number of germination	35	54	50	34	53	54	42	48	48	42	43	45	36	40	40
number of death	1	2	0	3	0	1	0	2	0	0	0	0	1	0	0
number of death	3	4	2	7	2	3	0	0	0	0	0	0	0	1	0
number of death	2	3	2	5	2	2	0	2	0	0	0	0	0	0	0
number of survival	33	51	52	30	54	52	45	48	50	46	47	46	39	42	44
number of survival	31	49	52	28	50	49	44	46	49	44	45	43	32	37	36
number of survival	33	51	48	29	51	52	42	46	48	42	43	45	36	40	40
number of EBF	0	0	0	0	0	0	1	8	19	1	6	15	1	3	5
number of EBF	0	0	0	0	0	0	3	9	21	2	5	13	0	2	6
number of EBF	0	0	0	0	0	0	2	8	19	0	4	14	1	4	6
EBF rate (%)	0	0	0	0	0	0	2.22222	16.6667	38	2.17391	12.766	32.6087	2.5641	7.14286	11.3636
EBF rate (%)	0	0	0	0	0	0	6.81818	19.5652	42.8571	4.54545	11.1111	30.2326	0	5.40541	16.6667
EBF rate (%)	0	0	0	0	0	0	4.7619	17.3913	39.5833	0	9.30233	31.1111	2.77778	10	15
Mean	0	0	0	0	0	0	4.60077	17.8744	40.1468	2.23979	11.0598	31.3175	1.78063	7.51609	14.3434
Standard	0	0	0	0	0	0	2.30221	1.50845	2.47712	2.27344	1.73239	1.20143	1.54576	2.31992	2.7118

## Sheet: Root activity 
Large
		﹣5℃					﹣3℃					0℃					3℃				5℃
	Repetition	25d	50d	81d	104d	125d	25d	50d	81d	104d	125d	14d	21d	25d	30d	45d	14d	21d	30d	45d	14d	21d	30d	45d
Weight (g)	Ⅰ	0.5053	0.5063	0.5053	0.5027	0.5049	0.507	0.5069	0.505	0.5024	0.5001	0.5005	0.511	0.5064	0.5163	0.5028	0.5038	0.508	0.5109	0.5006	0.5023	0.509	0.5079	0.508
	Ⅱ	0.5075	0.5016	0.5044	0.5047	0.5061	0.5029	0.5054	0.5049	0.5052	0.5014	0.5009	0.503	0.5032	0.5091	0.5037	0.5041	0.506	0.5171	0.5124	0.5025	0.507	0.5094	0.5094
	Ⅲ	0.5102	0.5008	0.5044	0.5052	0.506	0.5073	0.5014	0.5046	0.5057	0.5013	0.5011	0.504	0.5055	0.5094	0.5064	0.5044	0.511	0.5095	0.5067	0.5028	0.512	0.5043	0.5053
	CK	0.5093	0.5005	0.503	0.5016	0.5049	0.514	0.5144	0.504	0.5016	0.505	0.5004	0.503	0.5023	0.5001	0.5046	0.5048	0.511	0.511	0.5117	0.5021	0.509	0.5026	0.5156
Volumn (mL)		9	9	9	9	9	9	9	9	9	9	9	9	9	9	9	9	9	9	9	9	9	9	9
Dilution Ratio		1	3	3	3	3	1	3	3	3	3	1	1	1	1	2	1	1	1	2	1	1	1	1
Absorbance	Ⅰ	0.266	0.831	0.627	0.67	0.749	0.464	0.554	0.468	0.644	0.982	0.147	0.232	0.392	0.583	0.551	0.407	0.483	0.529	0.589	0.622	0.721	0.71	0.445
	Ⅱ	0.273	0.854	0.631	0.68	0.741	0.473	0.551	0.471	0.651	0.96	0.149	0.228	0.384	0.572	0.55	0.412	0.479	0.536	0.577	0.631	0.686	0.72	0.442
	Ⅲ	0.285	0.84	0.647	0.668	0.74	0.466	0.58	0.469	0.638	0.972	0.155	0.233	0.395	0.622	0.545	0.417	0.494	0.518	0.59	0.634	0.684	0.697	0.436
Root activity (µg·g-1·h-1 FW)	Ⅰ	20.9077	179.706	137.695	147.384	163.161	34.4985	122.148	104.736	142.041	213.619	12.7913	18.3471	29.5659	41.9395	81.6785	30.7599	35.7389	38.6855	87.3481	45.8243	52.0247	51.3798	33.1222
	Ⅱ	21.2996	186.202	138.773	148.879	161.115	35.4057	121.887	105.381	142.708	208.461	12.9208	18.3607	29.1978	41.7768	81.3937	31.0886	35.6036	38.6952	83.6981	46.4326	49.8151	51.9152	32.8252
	Ⅲ	22.0096	183.565	142.102	146.239	160.94	34.616	128.929	105.027	139.869	211.015	13.3345	18.6713	29.8261	45.1856	80.269	31.4169	36.282	38.0366	86.4346	46.6136	49.192	50.8449	32.6762
	Mean	21.4056	183.158	139.523	147.501	161.739	34.8401	124.322	105.048	141.539	211.032	13.0155	18.4597	29.5299	42.9673	81.1137	31.0885	35.8748	38.4724	85.8269	46.2902	50.344	51.3799	32.8745
	Standard	0.558537	3.26699	2.29715	1.32386	1.23487	0.4934	3.9926	0.322638	1.48441	2.57921	0.283692	0.183383	0.315709	1.92286	0.74532	0.328454	0.359076	0.377477	1.89933	0.413463	1.48854	0.53517	0.227083
Medium
		﹣5℃					﹣3℃					0℃					3℃				5℃
	Repetition	25d	50d	81d	104d	125d	25d	50d	81d	104d	125d	14d	21d	25d	30d	45d	14d	21d	30d	45d	14d	21d	30d	45d
Weight (g)	Ⅰ	0.5102	0.5057	0.5038	0.5048	0.5024	0.5097	0.5052	0.5034	0.5038	0.5057	0.5012	0.505	0.5078	0.5045	0.5048	0.5012	0.511	0.5112	0.5126	0.5036	0.505	0.5001	0.509
	Ⅱ	0.5106	0.5038	0.5037	0.5036	0.502	0.5054	0.5001	0.5041	0.5012	0.505	0.5018	0.5	0.5163	0.5028	0.5043	0.5014	0.5	0.5142	0.5014	0.5041	0.502	0.5061	0.5039
	Ⅲ	0.5036	0.5051	0.5047	0.5052	0.5018	0.5054	0.5065	0.505	0.5036	0.508	0.5015	0.503	0.5153	0.5044	0.5035	0.5019	0.507	0.5106	0.5075	0.5045	0.508	0.5136	0.5115
	CK	0.5065	0.5058	0.5042	0.5004	0.5002	0.5013	0.5005	0.5059	0.5018	0.5086	0.502	0.502	0.5148	0.5037	0.5156	0.5017	0.503	0.5118	0.5008	0.504	0.504	0.504	0.5086
Volumn (mL)		9	9	9	9	9	9	9	9	9	9	9	9	9	9	9	9	9	9	9	9	9	9	9
Dilution Ratio		1	3	3	3	3	1	3	3	3	3	1	1	1	1	1	1	1	1	1	1	1	1	1
Absorbance	Ⅰ	0.419	0.703	0.642	0.707	0.995	0.389	0.551	0.59	0.528	0.933	0.19	0.3	0.264	0.413	0.894	0.291	0.327	0.288	0.613	0.534	0.629	0.351	0.497
	Ⅱ	0.418	0.732	0.646	0.714	0.996	0.385	0.556	0.577	0.527	0.943	0.221	0.3	0.261	0.421	0.884	0.312	0.331	0.28	0.617	0.537	0.602	0.339	0.504
	Ⅲ	0.418	0.701	0.639	0.711	0.994	0.39	0.541	0.6	0.519	0.93	0.198	0.28	0.254	0.419	0.876	0.314	0.337	0.278	0.622	0.541	0.605	0.341	0.516
Root activity (µg·g-1·h-1 FW)	Ⅰ	31.1968	153.357	141.23	154.462	215.357	29.1686	121.936	130.502	117.484	201.086	15.7745	23.2752	20.667	31.1333	64.4456	22.8236	24.8502	22.1718	44.2894	39.5936	46.0642	27.0705	36.6308
	Ⅱ	31.1039	159.976	142.091	156.289	215.738	29.1399	124.228	127.614	117.884	203.442	17.9167	23.508	20.1235	31.7951	63.8158	24.2795	25.6768	21.4982	45.5578	39.7625	44.4581	25.9202	37.4874
	Ⅲ	31.5362	153.124	140.354	155.171	215.405	29.486	119.551	132.166	115.655	199.556	16.3231	21.9769	19.6874	31.5556	63.3614	24.3947	25.7362	21.5128	45.3548	40.0083	44.1396	25.6779	37.7511
	Mean	31.279	155.486	141.225	155.307	215.5	29.2648	121.905	130.094	117.008	201.361	16.6714	22.9201	20.1593	31.4946	63.8743	23.8326	25.4211	21.7276	45.0673	39.7881	44.8873	26.2229	37.2898
	Standard	0.227577	3.89058	0.868517	0.920979	0.207216	0.192056	2.33891	2.30322	1.18828	1.95805	1.11273	0.825018	0.490794	0.335091	0.544424	0.875748	0.495261	0.384758	0.681305	0.208545	1.0316	0.744018	0.585735
Small
		﹣5℃					﹣3℃					0℃					3℃				5℃
	Repetition	25d	50d	81d	104d	125d	25d	50d	81d	104d	125d	14d	21d	25d	30d	45d	14d	21d	30d	45d	14d	21d	30d	45d
Weight (g)	Ⅰ	0.5014	0.5042	0.503	0.5031	0.5037	0.501	0.5012	0.5063	0.5053	0.5016	0.5021	0.504	0.5037	0.5107	0.5066	0.5032	0.5	0.507	0.5028	0.5051	0.508	0.5056	0.5146
	Ⅱ	0.5149	0.507	0.504	0.5022	0.5048	0.5036	0.5074	0.5068	0.5062	0.5019	0.5025	0.506	0.5043	0.5055	0.5089	0.5035	0.507	0.505	0.5033	0.5054	0.504	0.5058	0.5038
	Ⅲ	0.5098	0.5097	0.503	0.5045	0.5052	0.5026	0.5021	0.5083	0.5042	0.5017	0.5019	0.507	0.5054	0.5109	0.5027	0.5039	0.506	0.5061	0.5042	0.5048	0.506	0.5136	0.5087
	CK	0.5112	0.5047	0.5041	0.5027	0.5024	0.5126	0.5076	0.5001	0.5024	0.5024	0.5024	0.509	0.5029	0.5109	0.5034	0.5029	0.506	0.5064	0.5039	0.5043	0.508	0.5056	0.5065
Volumn (mL)		9	9	9	9	9	9	9	9	9	9	9	9	9	9	9	9	9	9	9	9	9	9	9
Dilution Ratio		1	3	3	3	3	1	3	3	3	3	1	1	1	1	1	1	1	1	1	1	1	1	1
Absorbance	Ⅰ	0.27	0.866	0.596	0.618	0.773	0.389	0.773	0.476	0.602	0.869	0.169	0.188	0.267	0.372	0.656	0.319	0.345	0.367	0.621	0.339	0.441	0.336	0.444
	Ⅱ	0.275	0.896	0.598	0.613	0.778	0.393	0.79	0.473	0.611	0.859	0.172	0.17	0.259	0.384	0.65	0.321	0.336	0.359	0.632	0.342	0.432	0.361	0.489
	Ⅲ	0.264	0.872	0.581	0.616	0.772	0.399	0.778	0.475	0.613	0.861	0.167	0.184	0.26	0.369	0.643	0.315	0.353	0.369	0.646	0.347	0.424	0.362	0.457
Root activity (µg·g-1·h-1 FW)	Ⅰ	21.3494	187.739	131.857	136.42	168.55	29.6751	169.391	106.126	132.503	189.34	14.2833	15.5481	21.0436	27.9471	47.783	24.6793	26.6562	27.806	45.7092	25.9715	32.8468	25.7383	32.6295
	Ⅱ	21.1293	192.912	132.012	135.62	169.222	29.7997	170.837	105.4	134.133	187.136	14.4807	14.2423	20.4637	29.0649	47.1546	24.8035	25.6672	27.362	46.4283	26.1638	32.4829	27.4571	36.4534
	Ⅲ	20.586	186.949	128.728	135.625	167.842	30.2766	170.132	105.502	135.082	187.629	14.1496	15.1801	20.4883	27.7307	47.2491	24.3673	26.8932	27.9937	47.3167	26.5413	31.8014	27.1082	33.9018
	Mean	21.0216	189.2	130.866	135.888	168.538	29.9171	170.12	105.676	133.906	188.035	14.3045	14.9902	20.6652	28.2476	47.3956	24.6167	26.4055	27.7206	46.4847	26.2255	32.377	26.7678	34.3282
	Standard	0.392977	3.23884	1.85308	0.460419	0.69023	0.317481	0.723134	0.393002	1.3042	1.15676	0.166602	0.673306	0.327941	0.716074	0.338827	0.224731	0.650278	0.324401	0.80524	0.289877	0.530668	0.908521	1.9473

## Sheet: Soluble sugar
Large
		﹣5℃					﹣3℃					0℃					3℃				5℃
	Repetition	25d	50d	81d	104d	125d	25d	50d	81d	104d	125d	14d	21d	25d	30d	45d	14d	21d	30d	45d	14d	21d	30d	45d
Weight (g)	Ⅰ	2.0008	2.0006	2.0008	2.0002	2.0005	2.0006	2.0008	2.0006	2.0003	2.0008	2.0007	2.0006	2.0008	2.0004	2.0004	2.0001	2.0007	2.0011	2	2.0005	2.0004	2.0006	2.0009
	Ⅱ	2.0007	2.0005	2.0007	2.0002	2.0004	2.0005	2.0009	2.0004	2.0001	2.0009	2.0009	2.0005	2.0007	2.0006	2.0006	2.0003	2.0009	2.0013	2.0002	2.0007	2.0006	2.0008	2.0011
	Ⅲ	2.0009	2.0007	2.0009	2.0001	2.0006	2.0007	2.0006	2.0005	2.0002	2.0007	2.0008	2.0007	2.0009	2.0005	2.0005	2.0002	2.0008	2.0012	2.0001	2.0006	2.0005	2.0007	2.001
Volumn (mL)		50	50	50	50	50	50	50	50	50	50	50	50	50	50	50	50	50	50	50	50	50	50	50
Add the sample volumn(µL)		10	10	10	10	10	10	10	10	10	10	10	10	10	10	10	10	10	10	10	10	10	10	10
Dilution Ratio		10	10	10	10	10	10	10	10	10	10	10	10	10	10	10	10	10	10	10	10	10	10	10
Absorbance	Ⅰ	0.343	0.231	0.368	0.48	0.459	0.353	0.234	0.44	0.408	0.371	0.406	0.388	0.396	0.32	0.325	0.375	0.329	0.342	0.35	0.331	0.329	0.322	0.345
	Ⅱ	0.345	0.23	0.371	0.465	0.448	0.343	0.25	0.432	0.415	0.369	0.398	0.392	0.382	0.323	0.331	0.36	0.33	0.343	0.332	0.335	0.327	0.336	0.335
	Ⅲ	0.346	0.258	0.364	0.476	0.441	0.361	0.234	0.441	0.414	0.372	0.402	0.394	0.367	0.315	0.321	0.365	0.328	0.346	0.34	0.357	0.325	0.33	0.336
Soluble sugar content ( mg/g DW)	Ⅰ	588.904	384.652	634.504	839.046	800.61	607.205	390.085	765.91	707.642	639.976	703.852	671.052	685.577	547.061	556.183	647.499	563.396	586.992	601.913	567.1	563.48	550.654	592.522
	Ⅱ	592.581	382.847	640.008	811.678	780.582	588.992	419.249	751.392	720.485	636.296	689.19	678.382	660.073	552.479	567.072	620.067	565.163	588.757	569.01	574.34	559.775	576.136	574.225
	Ⅲ	594.346	433.884	627.177	831.789	767.734	621.767	390.124	767.773	718.625	641.832	696.521	681.963	632.649	537.912	548.858	629.221	561.543	594.257	583.636	614.501	556.155	565.22	576.078
	Mean	591.944	400.461	633.896	827.504	782.975	605.988	399.82	761.692	715.584	639.368	696.521	677.132	659.433	545.817	557.371	632.262	563.367	590.002	584.853	585.314	559.803	564.003	580.942
	Standard	2.77665	28.9591	6.43729	14.1785	16.568	16.4214	16.8262	8.96843	6.94065	2.81759	7.33089	5.56195	26.4699	7.36257	9.16525	13.9666	1.81006	3.78932	16.4849	25.5349	3.66275	12.7841	10.0715
Medium
		﹣5℃					﹣3℃					0℃					3℃				5℃
	Repetition	25d	50d	81d	104d	125d	25d	50d	81d	104d	125d	14d	21d	25d	30d	45d	14d	21d	30d	45d	14d	21d	30d	45d
Weight (g)	Ⅰ	2.0003	2.0007	2.0006	2.0004	2	2.0004	2.0005	2.0009	2.0007	2.0008	2.0007	2.0009	2.0003	2.0003	2.0011	2	2.0006	2.0008	2.0008	2.0005	2.0002	2.0014	2.0007
	Ⅱ	2.0004	2.0009	2.0002	2.0005	2.0001	2.0005	2.0003	2.0008	2.0009	2.0007	2.0009	2.0007	2.0004	2.0001	2.0013	1.9998	2.0008	2.0006	2.001	2.0003	2.0004	2.0012	2.0005
	Ⅲ	2.0002	2.0005	2.0004	2.0006	2	2.0003	2.0007	2.0009	2.0008	2.0009	2.0008	2.0008	2.0001	2.0002	2.0012	1.9999	2.0007	2.0007	2.0009	2.0004	2.0003	2.0013	2.0006
Volumn (mL)		50	50	50	50	50	50	50	50	50	50	50	50	50	50	50	50	50	50	50	50	50	50	50
Add the sample volumn(µL)		10	10	10	10	10	10	10	10	10	10	10	10	10	10	10	10	10	10	10	10	10	10	10
Dilution Ratio		10	10	10	10	10	10	10	10	10	10	10	10	10	10	10	10	10	10	10	10	10	10	10
Absorbance	Ⅰ	0.37	0.246	0.342	0.399	0.462	0.359	0.267	0.439	0.475	0.473	0.38	0.377	0.368	0.359	0.342	0.369	0.331	0.349	0.321	0.37	0.346	0.331	0.338
	Ⅱ	0.37	0.223	0.336	0.419	0.459	0.364	0.261	0.449	0.455	0.451	0.437	0.38	0.394	0.361	0.35	0.38	0.328	0.365	0.328	0.364	0.344	0.33	0.345
	Ⅲ	0.371	0.243	0.335	0.418	0.469	0.355	0.253	0.436	0.467	0.462	0.417	0.385	0.381	0.353	0.333	0.381	0.329	0.364	0.312	0.382	0.338	0.335	0.332
Soluble sugar content ( mg/g DW)	Ⅰ	638.312	411.994	587.138	691.187	806.284	618.212	450.346	763.971	829.716	826.026	656.425	650.888	634.663	618.243	586.992	636.583	567.072	599.848	548.775	638.248	594.554	566.845	579.813
	Ⅱ	638.28	370.003	576.308	727.638	800.77	627.302	439.444	782.25	793.154	785.937	760.324	656.425	682.065	621.954	601.522	656.721	561.543	629.095	561.487	627.365	590.846	565.078	592.641
	Ⅲ	640.168	406.563	574.426	725.778	819.058	610.945	424.763	758.5	815.082	805.922	723.881	665.513	658.447	607.326	570.549	658.513	563.396	627.239	532.332	660.172	579.929	574.168	568.896
	Mean	638.92	396.187	579.291	714.868	808.704	618.819	438.184	768.24	812.651	805.962	713.543	657.609	658.392	615.841	586.354	650.605	564.004	618.727	547.532	641.928	588.443	568.697	580.45
	Standard	1.08117	22.8379	6.86082	20.5292	9.38081	8.19571	12.8377	12.4372	18.4016	20.0446	52.715	7.3838	23.7012	7.60384	15.4959	12.177	2.81409	16.3765	14.6171	16.7106	7.60312	4.81946	11.8849
Small
		﹣5℃					﹣3℃					0℃					3℃				5℃
	Repetition	25d	50d	81d	104d	125d	25d	50d	81d	104d	125d	14d	21d	25d	30d	45d	14d	21d	30d	45d	14d	21d	30d	45d
Weight (g)	Ⅰ	0.4673	2.001	2.0002	2.0008	2.0007	0.5007	2.0002	0.5009	2	2.0002	2.0003	2.0001	2.0005	2.0004	2.0002	1.9993	2.001	2.0001	2.0007	2	2.0009	2.0007	2
	Ⅱ	0.467	2.0008	2.0003	2.0007	2.0008	0.5006	2.0001	0.5007	2.0002	2.0001	2.0005	2.0003	2.0007	2.0006	2	1.9995	2.0008	2.0003	2.0005	1.9998	2.0007	2.0005	2.0002
	Ⅲ	0.4676	2.0009	2.0001	2.0009	2.0006	0.5008	2.0003	0.5009	2.0001	2.0003	2.0004	2.0002	2.0003	2.0005	2.0001	1.9994	2.0009	2.0002	2.0006	1.9999	2.0008	2.0006	2.0001
Volumn (mL)		50	50	50	50	50	50	50	50	50	50	50	50	50	50	50	50	50	50	50	50	50	50	50
Add the sample volumn(µL)		40	10	10	10	10	40	10	40	10	10	10	10	10	10	10	10	10	10	10	10	10	10	10
Dilution Ratio		10	10	10	10	10	10	10	10	10	10	10	10	10	10	10	10	10	10	10	10	10	10	10
Absorbance	Ⅰ	0.317	0.262	0.389	0.421	0.451	0.395	0.231	0.41	0.408	0.426	0.414	0.37	0.362	0.32	0.332	0.38	0.342	0.296	0.312	0.363	0.318	0.295	0.298
	Ⅱ	0.309	0.257	0.391	0.418	0.443	0.388	0.234	0.412	0.442	0.431	0.351	0.373	0.356	0.329	0.329	0.388	0.33	0.309	0.322	0.353	0.312	0.305	0.305
	Ⅲ	0.339	0.251	0.371	0.415	0.449	0.372	0.237	0.39	0.408	0.416	0.353	0.367	0.367	0.316	0.321	0.389	0.336	0.31	0.319	0.354	0.3	0.3	0.294
Soluble sugar content ( mg/g DW)	Ⅰ	579.602	441.114	673.01	731.177	785.937	683.07	384.729	710.119	707.748	740.519	718.589	638.376	623.654	547.061	569.01	656.885	587.021	503.351	532.386	625.634	543.276	501.376	507.025
	Ⅱ	564.344	432.038	676.626	725.741	771.306	670.448	390.222	714.047	769.713	749.68	603.586	643.785	612.647	563.424	563.593	671.421	565.191	527.019	550.682	607.447	532.386	519.669	519.747
	Ⅲ	622.156	421.073	640.2	720.197	782.328	641.031	395.656	673.69	707.713	722.238	607.265	632.87	632.838	539.736	548.967	673.28	576.107	528.87	545.182	609.242	510.471	510.522	499.702
	Mean	588.701	431.408	663.279	725.705	779.857	664.85	390.202	699.285	728.391	737.479	643.147	638.344	623.046	550.073	560.523	667.195	576.106	519.746	542.75	614.108	528.711	510.522	508.825
	Standard	29.9606	10.0354	20.0682	5.49015	7.6223	21.5712	5.46384	22.2533	35.7855	13.9714	65.3605	5.45768	10.1096	12.1278	10.3679	8.97719	10.9148	14.2291	9.3874	10.0224	16.7085	9.14653	10.143

## Sheet: Starch
Large
		﹣5℃					﹣3℃					0℃					3℃				5℃
	Repetition	25d	50d	81d	104d	125d	25d	50d	81d	104d	125d	14d	21d	25d	30d	45d	14d	21d	30d	45d	14d	21d	30d	45d
Weight (g)	Ⅰ	2.0008	2.0006	2.0008	2.0002	2.0005	2.0006	2.0008	2.0006	2.0003	2.0008	2.0007	2.0006	2.0008	2.0004	2.0004	2.0001	2.0007	2.0011	2	2.0005	2.0004	2.0006	2.0009
	Ⅱ	2.0007	2.0005	2.0007	2.0002	2.0004	2.0005	2.0009	2.0004	2.0001	2.0009	2.0009	2.0005	2.0007	2.0006	2.0006	2.0003	2.0009	2.0013	2.0002	2.0007	2.0006	2.0008	2.0011
	Ⅲ	2.0009	2.0007	2.0009	2.0001	2.0006	2.0007	2.0006	2.0005	2.0002	2.0007	2.0008	2.0007	2.0009	2.0005	2.0005	2.0002	2.0008	2.0012	2.0001	2.0006	2.0005	2.0007	2.001
Volumn (mL)		25	25	25	25	25	25	25	25	25	25	25	50	25	25	25	25	25	25	25	25	25	25	25
Add the sample volumn(µL)		20	20	20	20	20	20	20	20	20	20	20	20	20	20	20	20	20	20	20	20	20	20	20
Absorbance	Ⅰ	0.735	0.608	0.708	0.523	0.605	0.62	0.603	0.54	0.536	0.488	0.632	0.327	0.468	0.386	0.419	0.72	0.657	0.669	0.467	0.855	0.655	0.568	0.567
	Ⅱ	0.718	0.623	0.696	0.514	0.558	0.641	0.606	0.537	0.593	0.447	0.63	0.318	0.486	0.391	0.428	0.725	0.66	0.664	0.472	0.845	0.649	0.579	0.573
	Ⅲ	0.738	0.614	0.723	0.556	0.566	0.648	0.605	0.536	0.541	0.448	0.658	0.319	0.522	0.385	0.415	0.715	0.649	0.67	0.462	0.848	0.657	0.571	0.577
Starch content (mg/g DW)	Ⅰ	103.336	84.4527	99.3195	71.8218	84.0106	86.2379	83.7005	74.3364	73.7524	66.5939	88.0187	85.2978	63.6188	51.4313	56.3412	101.14	91.7377	93.5041	63.4954	121.204	91.4539	78.5019	78.3414
	Ⅱ	100.812	86.6885	97.5394	70.4826	77.022	89.3665	84.1425	73.8975	82.2417	60.492	87.7124	82.6241	66.2997	52.17	57.6744	101.874	92.1748	92.7512	64.2331	119.705	90.5521	80.1304	79.226
	Ⅲ	103.777	85.341	101.546	76.7359	78.2044	90.3989	84.0064	73.7451	74.5001	60.6468	91.8819	82.9134	71.6479	51.28	55.7433	100.391	90.5431	93.6482	62.7482	120.157	91.7469	78.9443	79.8249
	Mean	102.642	85.4941	99.4682	73.0134	79.7456	88.6677	83.9498	73.993	76.8314	62.5775	89.2043	83.6117	67.1888	51.6271	56.5863	101.135	91.4852	93.3012	63.4923	120.355	91.251	79.1922	79.1308
	Standard	1.5997	1.12576	2.00732	3.29258	3.74054	2.16671	0.226394	0.307037	4.70033	3.4791	2.32388	1.4673	4.08772	0.476228	0.988657	0.741455	0.844639	0.4817	0.742425	0.76929	0.622678	0.842048	0.746302
Medium
		﹣5℃					﹣3℃					0℃					3℃				5℃
	Repetition	25d	50d	81d	104d	125d	25d	50d	81d	104d	125d	14d	21d	25d	30d	45d	14d	21d	30d	45d	14d	21d	30d	45d
Weight (g)	Ⅰ	2.0003	2.0007	2.0006	2.0004	2	2.0004	2.0005	2.0009	2.0007	2.0008	2.0007	2.0009	2.0003	2.0003	2.0011	2	2.0006	2.0008	2.0008	2.0005	2.0002	2.0014	2.0007
	Ⅱ	2.0004	2.0009	2.0002	2.0005	2.0001	2.0005	2.0003	2.0008	2.0009	2.0007	2.0009	2.0007	2.0004	2.0001	2.0013	1.9998	2.0008	2.0006	2.001	2.0003	2.0004	2.0012	2.0005
	Ⅲ	2.0002	2.0005	2.0004	2.0006	2	2.0003	2.0007	2.0009	2.0008	2.0009	2.0008	2.0008	2.0001	2.0002	2.0012	1.9999	2.0007	2.0007	2.0009	2.0004	2.0003	2.0013	2.0006
Volumn (mL)		25	25	25	25	25	25	25	25	25	25	25	25	25	25	25	25	25	25	25	25	25	25	25
Add the sample volumn(µL)		20	20	20	20	20	20	20	20	20	20	20	20	20	20	20	20	20	20	20	20	20	20	20
Absorbance	Ⅰ	0.702	0.631	0.704	0.595	0.538	0.621	0.609	0.487	0.627	0.388	0.522	0.509	0.346	0.44	0.346	0.725	0.574	0.529	0.526	0.874	0.519	0.666	0.703
	Ⅱ	0.701	0.622	0.794	0.6	0.57	0.606	0.605	0.475	0.621	0.382	0.531	0.502	0.366	0.448	0.399	0.714	0.571	0.533	0.522	0.875	0.521	0.656	0.714
	Ⅲ	0.698	0.616	0.741	0.596	0.551	0.602	0.608	0.439	0.603	0.41	0.528	0.506	0.358	0.441	0.41	0.718	0.566	0.532	0.516	0.873	0.524	0.654	0.707
Starch content (mg/g DW)	Ⅰ	98.4516	87.8699	98.7344	82.5269	74.0611	86.3953	84.6057	66.4418	87.2749	51.7186	71.655	69.7142	45.4823	59.4686	45.4641	101.889	79.3946	72.6927	72.2465	124.031	71.2266	93.044	98.5807
	Ⅱ	98.2979	86.5224	112.146	83.2667	78.8192	84.1593	84.019	64.6601	86.3737	50.8286	72.9866	68.6798	48.4557	60.665	53.3415	100.262	78.9404	73.2951	71.6443	124.192	71.517	91.5661	100.227
	Ⅲ	97.8613	85.6471	104.249	82.6674	75.9957	83.5726	84.4484	59.302	83.7005	54.9884	72.544	69.2714	47.2725	59.6204	54.9801	100.852	78.2005	73.1427	70.7554	123.889	71.967	91.2641	99.1807
	Mean	98.2036	86.6798	105.043	82.8204	76.292	84.7091	84.3577	63.468	85.783	52.5118	72.3952	69.2218	47.0702	59.918	51.2619	101.001	78.8451	73.0435	71.5487	124.037	71.5702	91.958	99.3295
	Standard	0.306222	1.11975	6.74092	0.392865	2.39283	1.48948	0.303697	3.71618	1.85898	2.19042	0.678126	0.518958	1.49698	0.651357	5.08745	0.823599	0.602694	0.313174	0.750114	0.151982	0.373048	0.952513	0.833217
Small
		﹣5℃					﹣3℃					0℃					3℃				5℃
	Repetition	25d	50d	81d	104d	125d	25d	50d	81d	104d	125d	14d	21d	25d	30d	45d	14d	21d	30d	45d	14d	21d	30d	45d
Weight (g)	Ⅰ	0.4673	2.001	2.0002	2.0008	2.0007	0.5007	2.0002	0.5009	2	2.0002	2.0003	2.0001	2.0005	2.0004	2.0002	1.9993	2.001	2.0001	2.0007	2	2.0009	2.0007	2
	Ⅱ	0.467	2.0008	2.0003	2.0007	2.0008	0.5006	2.0001	0.5007	2.0002	2.0001	2.0005	2.0003	2.0007	2.0006	2	1.9995	2.0008	2.0003	2.0005	1.9998	2.0007	2.0005	2.0002
	Ⅲ	0.4676	2.0009	2.0001	2.0009	2.0006	0.5008	2.0003	0.5009	2.0001	2.0003	2.0004	2.0002	2.0003	2.0005	2.0001	1.9994	2.0009	2.0002	2.0006	1.9999	2.0008	2.0006	2.0001
Volumn (mL)		25	25	25	25	25	25	25	25	25	25	25	25	25	25	25	50	25	25	25	25	25	25	25
Add the sample volumn(µL)		80	20	20	20	20	80	20	80	20	20	20	20	20	20	20	20	20	20	20	20	20	20	20
Absorbance	Ⅰ	0.571	0.666	0.642	0.521	0.517	0.597	0.569	0.366	0.443	0.448	0.584	0.582	0.402	0.442	0.433	0.387	0.486	0.592	0.578	0.959	0.555	0.589	0.766
	Ⅱ	0.589	0.685	0.697	0.598	0.579	0.587	0.562	0.371	0.484	0.434	0.583	0.581	0.424	0.439	0.408	0.381	0.486	0.59	0.594	0.96	0.549	0.588	0.765
	Ⅲ	0.612	0.674	0.639	0.591	0.574	0.586	0.589	0.358	0.425	0.441	0.589	0.575	0.404	0.441	0.381	0.393	0.468	0.595	0.533	0.962	0.56	0.599	0.757
Starch content (mg/g DW)	Ⅰ	84.4981	93.0626	89.5287	71.5027	70.9112	82.7252	78.6664	48.3783	59.9239	60.6619	80.8944	80.6048	53.8092	59.7632	58.43	103.217	66.2897	82.0929	79.9856	136.711	76.5565	81.622	107.99
	Ⅱ	87.4203	95.8982	97.7077	82.9608	80.1304	81.2554	77.6287	49.1406	66.0186	58.5817	80.7375	80.448	57.0765	59.3109	54.7155	101.42	66.2964	81.7871	82.374	136.874	75.6716	81.4814	107.831
	Ⅲ	90.968	94.2572	89.0867	81.9113	79.3946	81.0744	81.6383	47.1899	57.2425	59.6174	81.6342	79.5592	54.1121	59.6114	50.695	104.998	63.6156	82.5352	73.2951	137.164	77.3041	83.1138	106.646
	Mean	87.6288	94.406	92.1077	78.7916	76.8121	81.685	79.3112	48.2363	61.0617	59.6203	81.0887	80.204	54.9993	59.5618	54.6135	103.212	65.4006	82.1384	78.5516	136.916	76.5107	82.0724	107.489
	Standard	3.23997	1.42365	4.85475	6.33416	5.12349	0.905392	2.08109	0.983076	4.49736	1.04012	0.478912	0.563887	1.80531	0.23018	3.86848	1.78883	1.54581	0.376108	4.7063	0.229654	0.817212	0.904596	0.734607

## Sheet: Protein
Large		﹣5℃					﹣3℃					0℃					3℃				5℃
	Repetition	25d	50d	81d	104d	125d	25d	50d	81d	104d	125d	14d	21d	25d	30d	45d	14d	21d	30d	45d	14d	21d	30d	45d
Weight (g)	Ⅰ	2.0008	2.0006	2.0008	2.0002	2.0005	2.0006	2.0008	2.0006	2.0003	2.0008	2.0007	2.0006	2.0008	2.0004	2.0004	2.0001	2.0007	2.0011	2	2.0005	2.0004	2.0006	2.0009
	Ⅱ	2.0007	2.0005	2.0007	2.0002	2.0004	2.0005	2.0009	2.0004	2.0001	2.0009	2.0009	2.0005	2.0007	2.0006	2.0006	2.0003	2.0009	2.0013	2.0002	2.0007	2.0006	2.0008	2.0011
	Ⅲ	2.0009	2.0007	2.0009	2.0001	2.0006	2.0007	2.0006	2.0005	2.0002	2.0007	2.0008	2.0007	2.0009	2.0005	2.0005	2.0002	2.0008	2.0012	2.0001	2.0006	2.0005	2.0007	2.001
Volumn (mL)		50	50	50	50	50	50	50	50	50	50	50	50	50	50	50	50	50	50	50	50	50	50	50
Add the sample volumn(µL)		80	80	80	80	80	80	80	80	80	80	70	70	80	70	70	70	70	70	70	70	70	70	70
Absorbance	Ⅰ	0.381	0.366	0.362	0.35	0.303	0.351	0.34	0.337	0.397	0.368	0.445	0.406	0.382	0.392	0.389	0.362	0.326	0.289	0.336	0.373	0.439	0.348	0.3
	Ⅱ	0.398	0.371	0.365	0.34	0.343	0.364	0.349	0.331	0.39	0.378	0.432	0.411	0.394	0.387	0.39	0.377	0.322	0.272	0.363	0.361	0.434	0.334	0.307
	Ⅲ	0.377	0.374	0.374	0.35	0.338	0.363	0.359	0.339	0.383	0.368	0.421	0.389	0.395	0.38	0.421	0.368	0.328	0.292	0.345	0.358	0.43	0.345	0.312
Protein content (mg/g DW)	Ⅰ	13.0665	12.3984	12.2187	11.6866	9.58716	11.7289	11.2369	11.1041	13.784	12.4864	18.1982	16.2098	13.1112	15.4973	15.3443	13.9691	12.1287	10.2396	12.6432	14.5274	17.8948	13.2515	10.8016
	Ⅱ	13.8259	12.6222	12.3531	11.2403	11.373	12.3097	11.6379	10.8374	13.4729	12.932	17.5334	16.4657	13.6474	15.2407	15.3937	14.7329	11.9235	9.37174	14.0194	13.9139	17.638	12.5361	11.1574
	Ⅲ	12.8874	12.7548	12.7535	11.6872	11.1487	12.2639	12.086	11.1939	13.1597	12.487	16.9732	15.342	13.6906	14.8844	16.9758	14.2745	12.2301	10.392	13.1017	13.7615	17.4349	13.0978	11.413
	Mean	13.2599	12.5918	12.4418	11.538	10.703	12.1009	11.6536	11.0452	13.4722	12.6352	17.5683	16.0058	13.483	15.2075	15.9046	14.3255	12.0941	10.0011	13.2548	14.0676	17.6559	12.9618	11.124
	Standard	0.498234	0.180135	0.278233	0.257894	0.972813	0.322908	0.424767	0.185428	0.312131	0.257095	0.613212	0.588985	0.322785	0.307788	0.928001	0.384451	0.156203	0.550355	0.700735	0.405392	0.230508	0.376562	0.307075
Medium
		﹣5℃					﹣3℃					0℃					3℃				5℃
	Repetition	25d	50d	81d	104d	125d	25d	50d	81d	104d	125d	14d	21d	25d	30d	45d	14d	21d	30d	45d	14d	21d	30d	45d
Weight (g)	Ⅰ	2.0003	2.0007	2.0006	2.0004	2	2.0004	2.0005	2.0009	2.0007	2.0008	2.0007	2.0009	2.0003	2.0003	2.0011	2	2.0006	2.0008	2.0008	2.0005	2.0002	2.0014	2.0007
	Ⅱ	2.0004	2.0009	2.0002	2.0005	2.0001	2.0005	2.0003	2.0008	2.0009	2.0007	2.0009	2.0007	2.0004	2.0001	2.0013	1.9998	2.0008	2.0006	2.001	2.0003	2.0004	2.0012	2.0005
	Ⅲ	2.0002	2.0005	2.0004	2.0006	2	2.0003	2.0007	2.0009	2.0008	2.0009	2.0008	2.0008	2.0001	2.0002	2.0012	1.9999	2.0007	2.0007	2.0009	2.0004	2.0003	2.0013	2.0006
Volumn (mL)		50	50	50	50	50	50	50	50	50	50	50	50	50	50	50	50	50	50	50	50	50	50	50
Add the sample volumn(µL)		80	80	80	80	80	80	80	80	80	80	70	70	80	70	70	70	70	70	70	70	70	70	70
Absorbance	Ⅰ	0.37	0.36	0.371	0.356	0.333	0.418	0.342	0.388	0.392	0.401	0.419	0.403	0.435	0.421	0.415	0.42	0.408	0.328	0.352	0.413	0.432	0.389	0.348
	Ⅱ	0.382	0.338	0.364	0.348	0.322	0.411	0.347	0.391	0.394	0.413	0.428	0.408	0.445	0.414	0.405	0.412	0.411	0.338	0.354	0.417	0.421	0.375	0.358
	Ⅲ	0.39	0.348	0.359	0.372	0.344	0.422	0.354	0.385	0.395	0.407	0.427	0.396	0.438	0.423	0.418	0.419	0.417	0.329	0.338	0.419	0.427	0.377	0.357
Protein content (mg/g DW)	Ⅰ	12.5788	12.13	12.6215	11.9533	10.9289	14.7206	11.3278	13.3783	13.5581	13.9591	16.8721	16.0544	15.4802	16.9775	16.6647	16.929	16.3118	12.2301	13.4542	16.5677	17.5395	15.3366	13.2508
	Ⅱ	13.1138	11.1471	12.3116	11.5956	10.4373	14.4075	11.5521	13.5128	13.646	14.4953	17.3294	16.311	15.9258	16.622	16.1532	16.5225	16.4632	12.7414	13.5548	16.7734	16.9766	14.6243	13.7622
	Ⅲ	13.4722	11.5956	12.0872	12.6662	11.4199	14.8999	11.8622	13.2444	13.6913	14.2261	17.2792	15.6982	15.6157	17.0804	16.8169	16.8788	16.7701	12.2818	12.7395	16.8746	17.2836	14.7255	13.7105
	Mean	13.0549	11.6242	12.3401	12.0717	10.9287	14.676	11.5807	13.3785	13.6318	14.2268	17.1602	16.0212	15.6739	16.8933	16.5449	16.7768	16.515	12.4178	13.2495	16.7386	17.2666	14.8955	13.5745
	Standard	0.449606	0.492091	0.268317	0.545009	0.491342	0.249239	0.268347	0.134209	0.067725	0.268118	0.250805	0.307759	0.228419	0.240476	0.347685	0.221643	0.233463	0.281476	0.444516	0.156386	0.281823	0.385381	0.28153
Small
		﹣5℃					﹣3℃					0℃					3℃				5℃
	Repetition	25d	50d	81d	104d	125d	25d	50d	81d	104d	125d	14d	21d	25d	30d	45d	14d	21d	30d	45d	14d	21d	30d	45d
Weight (g)	Ⅰ	0.4673	2.001	2.0002	2.0008	2.0007	0.5007	2.0002	0.5009	2	2.0002	2.0003	2.0001	2.0005	2.0004	2.0002	1.9993	2.001	2.0001	2.0007	2	2.0009	2.0007	2
	Ⅱ	0.467	2.0008	2.0003	2.0007	2.0008	0.5006	2.0001	0.5007	2.0002	2.0001	2.0005	2.0003	2.0007	2.0006	2	1.9995	2.0008	2.0003	2.0005	1.9998	2.0007	2.0005	2.0002
	Ⅲ	0.4676	2.0009	2.0001	2.0009	2.0006	0.5008	2.0003	0.5009	2.0001	2.0003	2.0004	2.0002	2.0003	2.0005	2.0001	1.9994	2.0009	2.0002	2.0006	1.9999	2.0008	2.0006	2.0001
Volumn (mL)		50	50	50	50	50	50	50	50	50	50	50	50	50	50	50	50	50	50	50	50	50	50	50
Add the sample volumn(µL)		200	80	80	80	80	200	80	200	80	80	70	70	80	70	70	70	70	70	70	70	70	70	70
Absorbance	Ⅰ	0.275	0.401	0.405	0.386	0.364	0.299	0.426	0.311	0.405	0.358	0.47	0.452	0.445	0.424	0.416	0.438	0.413	0.362	0.412	0.462	0.431	0.406	0.355
	Ⅱ	0.285	0.378	0.413	0.36	0.37	0.321	0.412	0.306	0.422	0.361	0.468	0.458	0.454	0.398	0.401	0.454	0.445	0.349	0.413	0.455	0.423	0.403	0.346
	Ⅲ	0.268	0.403	0.415	0.372	0.348	0.297	0.417	0.3	0.408	0.349	0.471	0.455	0.446	0.426	0.413	0.438	0.434	0.351	0.4	0.474	0.44	0.386	0.362
Protein content (mg/g DW)	Ⅰ	14.277	13.9577	14.1418	13.2897	12.3085	15.0365	15.0792	15.8861	14.1432	12.0438	19.4771	18.5608	15.925	17.1297	16.7232	17.8536	16.5636	13.9691	16.515	19.0719	17.4824	16.209	13.6126
	Ⅱ	15.0509	12.9327	14.4982	12.13	12.5757	16.6091	14.455	15.5358	14.9007	12.1783	19.3732	18.865	16.325	15.8018	15.9596	18.6684	18.1973	13.3045	16.5677	18.7166	17.0761	16.0576	13.1521
	Ⅲ	13.7331	14.0476	14.5889	12.6643	11.595	14.8909	14.6767	15.1018	14.2764	11.6414	19.5272	18.7129	15.9712	17.2308	16.571	17.8527	17.6354	13.4072	15.9038	19.6851	17.9423	15.1897	13.9691
	Mean	14.3537	13.646	14.4096	12.6947	12.1597	15.5122	14.737	15.5079	14.4401	11.9545	19.4592	18.7129	16.0738	16.7208	16.418	18.1249	17.4654	13.5602	16.3289	19.1579	17.5002	15.8188	13.5779
	Standard	0.662222	0.619384	0.236349	0.58043	0.506952	0.952757	0.316445	0.392903	0.404383	0.279342	0.078559	0.152113	0.218854	0.797456	0.404181	0.470661	0.830001	0.357751	0.369046	0.489952	0.433358	0.550028	0.409583

## Sheet: Amino acid
Large		﹣5℃					﹣3℃					0℃					3℃				5℃
	Repetition	25d	50d	81d	104d	125d	25d	50d	81d	104d	125d	14d	21d	25d	30d	45d	14d	21d	30d	45d	14d	21d	30d	45d
Weight (g)	Ⅰ	2.0008	2.0006	2.0008	2.0002	2.0005	2.0006	2.0008	2.0006	2.0003	2.0008	2.0007	2.0006	2.0008	2.0004	2.0004	2.0001	2.0007	2.0011	2	2.0005	2.0004	2.0006	2.0009
	Ⅱ	2.0007	2.0005	2.0007	2.0002	2.0004	2.0005	2.0009	2.0004	2.0001	2.0009	2.0009	2.0005	2.0007	2.0006	2.0006	2.0003	2.0009	2.0013	2.0002	2.0007	2.0006	2.0008	2.0011
	Ⅲ	2.0009	2.0007	2.0009	2.0001	2.0006	2.0007	2.0006	2.0005	2.0002	2.0007	2.0008	2.0007	2.0009	2.0005	2.0005	2.0002	2.0008	2.0012	2.0001	2.0006	2.0005	2.0007	2.001
Volumn (mL)		50	50	50	50	50	50	50	50	50	50	50	50	50	50	50	50	50	50	50	50	50	50	50
Add the sample volumn(µL)		450	450	450	450	450	450	450	450	450	450	450	450	450	450	450	450	450	450	450	450	450	450	450
Absorbance	Ⅰ	0.532	0.478	0.61	0.429	0.564	0.423	0.535	0.603	0.483	0.644	0.448	0.456	0.405	0.585	0.544	0.444	0.709	0.524	0.734	0.527	0.685	0.678	0.796
	Ⅱ	0.555	0.499	0.557	0.463	0.673	0.419	0.491	0.595	0.472	0.694	0.44	0.467	0.404	0.584	0.545	0.45	0.708	0.525	0.755	0.522	0.68	0.676	0.795
	Ⅲ	0.544	0.499	0.54	0.434	0.532	0.426	0.495	0.642	0.49	0.707	0.438	0.466	0.406	0.582	0.54	0.456	0.71	0.53	0.76	0.53	0.679	0.681	0.796
Amino acid content (mg/g DW)	Ⅰ	2.15536	1.93982	2.46698	1.7444	2.28355	1.72007	2.16735	2.43926	1.9601	2.60281	1.81987	1.85192	1.64799	2.36758	2.20375	1.80443	2.86263	2.12309	2.96355	2.13571	2.76716	2.73892	3.2099
	Ⅱ	2.24736	2.02383	2.25535	1.88027	2.71921	1.70418	1.99147	2.40754	1.91633	2.80243	1.78773	1.89597	1.64408	2.36334	2.20752	1.82823	2.85835	2.12687	3.04718	2.11552	2.74691	2.73065	3.20559
	Ⅲ	2.2032	2.02363	2.18722	1.76447	2.15558	1.73197	2.00775	2.59521	1.98817	2.85464	1.77983	1.89178	1.6519	2.35547	2.18765	1.85229	2.86649	2.14695	3.06731	2.14759	2.74305	2.75077	3.20974
	Mean	2.20197	1.99576	2.30318	1.79638	2.38611	1.71874	2.05552	2.48067	1.95486	2.75329	1.79581	1.87989	1.64799	2.36213	2.19964	1.82832	2.86249	2.1323	3.02602	2.13294	2.75237	2.74011	3.20841
	Standard	0.0460116	0.0484426	0.145886	0.0733425	0.295483	0.0139461	0.0971876	0.100457	0.0362031	0.132911	0.0212085	0.0243115	0.0039127	0.00614326	0.0105512	0.0239326	0.00406838	0.0128237	0.0550223	0.0162132	0.0129519	0.0101095	0.00244644
Medium
		﹣5℃					﹣3℃					0℃					3℃				5℃
	Repetition	25d	50d	81d	104d	125d	25d	50d	81d	104d	125d	14d	21d	25d	30d	45d	14d	21d	30d	45d	14d	21d	30d	45d
Weight (g)	Ⅰ	2.0003	2.0007	2.0006	2.0004	2	2.0004	2.0005	2.0009	2.0007	2.0008	2.0007	2.0009	2.0003	2.0003	2.0011	2	2.0006	2.0008	2.0008	2.0005	2.0002	2.0014	2.0007
	Ⅱ	2.0004	2.0009	2.0002	2.0005	2.0001	2.0005	2.0003	2.0008	2.0009	2.0007	2.0009	2.0007	2.0004	2.0001	2.0013	1.9998	2.0008	2.0006	2.001	2.0003	2.0004	2.0012	2.0005
	Ⅲ	2.0002	2.0005	2.0004	2.0006	2	2.0003	2.0007	2.0009	2.0008	2.0009	2.0008	2.0008	2.0001	2.0002	2.0012	1.9999	2.0007	2.0007	2.0009	2.0004	2.0003	2.0013	2.0006
Volumn (mL)		50	50	50	50	50	50	50	50	50	50	50	50	50	50	50	50	50	50	50	50	50	50	50
Add the sample volumn(µL)		450	450	450	450	450	450	450	450	450	450	450	450	450	450	450	450	450	450	450	450	450	450	450
Absorbance	Ⅰ	0.433	0.417	0.612	0.453	0.658	0.451	0.502	0.553	0.464	0.735	0.518	0.484	0.541	0.554	0.654	0.49	0.62	0.618	0.773	0.564	0.669	0.681	0.766
	Ⅱ	0.429	0.426	0.6	0.43	0.746	0.447	0.453	0.543	0.44	0.713	0.529	0.505	0.559	0.55	0.644	0.506	0.625	0.619	0.785	0.559	0.649	0.689	0.751
	Ⅲ	0.401	0.465	0.555	0.404	0.751	0.446	0.483	0.532	0.399	0.676	0.509	0.514	0.5	0.557	0.65	0.496	0.621	0.623	0.779	0.539	0.671	0.682	0.759
Amino acid content (mg/g DW)	Ⅰ	1.76029	1.69602	2.47522	1.84012	2.65981	1.83213	2.03582	2.23915	1.88379	2.96636	2.09954	1.9635	2.19187	2.24382	2.64237	1.98837	2.50718	2.49894	3.11818	2.28355	2.7035	2.74981	3.09037
	Ⅱ	1.74422	1.7318	2.42776	1.74813	3.01136	1.81606	1.84021	2.19931	1.78773	2.87862	2.14327	2.0476	2.26368	2.22806	2.60216	2.05252	2.52691	2.50319	3.1658	2.2638	2.62331	2.78203	3.03074
	Ⅲ	1.6325	1.88798	2.2477	1.64416	3.0315	1.81224	1.9597	2.15526	1.62402	2.73052	2.06348	2.08345	2.02823	2.25592	2.62626	2.01245	2.51105	2.51904	3.14199	2.18377	2.71136	2.75394	3.06255
	Mean	1.71234	1.77193	2.38356	1.74414	2.90089	1.82014	1.94525	2.19791	1.76518	2.8585	2.1021	2.03152	2.16126	2.2426	2.6236	2.01778	2.51505	2.50706	3.14199	2.2437	2.67939	2.76193	3.06122
	Standard	0.069607	0.102079	0.120026	0.0980419	0.209026	0.0105554	0.0986002	0.0419638	0.131346	0.119203	0.0399586	0.0615708	0.120673	0.0139713	0.0202342	0.0324064	0.0104516	0.0105948	0.0238122	0.0528387	0.0487231	0.0175368	0.0298354
Small
		﹣5℃					﹣3℃					0℃					3℃				5℃
	Repetition	25d	50d	81d	104d	125d	25d	50d	81d	104d	125d	14d	21d	25d	30d	45d	14d	21d	30d	45d	14d	21d	30d	45d
Weight (g)	Ⅰ	0.4673	2.001	2.0002	2.0008	2.0007	0.5007	2.0002	0.5009	2	2.0002	2.0003	2.0001	2.0005	2.0004	2.0002	1.9993	2.001	2.0001	2.0007	2	2.0009	2.0007	2
	Ⅱ	0.467	2.0008	2.0003	2.0007	2.0008	0.5006	2.0001	0.5007	2.0002	2.0001	2.0005	2.0003	2.0007	2.0006	2	1.9995	2.0008	2.0003	2.0005	1.9998	2.0007	2.0005	2.0002
	Ⅲ	0.4676	2.0009	2.0001	2.0009	2.0006	0.5008	2.0003	0.5009	2.0001	2.0003	2.0004	2.0002	2.0003	2.0005	2.0001	1.9994	2.0009	2.0002	2.0006	1.9999	2.0008	2.0006	2.0001
Volumn (mL)		50	50	50	50	50	50	50	50	50	50	50	50	50	50	50	50	50	50	50	50	50	50	50
Add the sample volumn(µL)		600	450	450	450	450	600	450	600	450	450	450	450	450	450	450	450	450	450	450	450	450	450	450
Absorbance	Ⅰ	0.16	0.512	0.71	0.599	0.588	0.186	0.603	0.187	0.6	0.601	0.591	0.591	0.432	0.64	0.746	0.53	0.707	0.766	0.854	0.588	0.591	0.786	0.743
	Ⅱ	0.134	0.55	0.676	0.574	0.49	0.18	0.575	0.18	0.62	0.603	0.599	0.601	0.417	0.638	0.749	0.532	0.713	0.77	0.834	0.594	0.593	0.796	0.741
	Ⅲ	0.169	0.494	0.665	0.635	0.503	0.167	0.603	0.178	0.592	0.61	0.595	0.559	0.434	0.641	0.75	0.525	0.707	0.771	0.844	0.58	0.59	0.795	0.748
Amino acid content (mg/g DW)	Ⅰ	2.14894	2.07526	2.86735	2.42303	2.37921	2.3169	2.43975	2.32794	2.428	2.43175	2.39167	2.39191	1.75612	2.58735	3.01121	2.14899	2.85422	3.09129	3.44195	2.38004	2.39095	3.17027	2.99952
	Ⅱ	1.81655	2.22728	2.73134	2.32327	1.98757	2.24551	2.32797	2.24506	2.50768	2.43987	2.4234	2.43163	1.69602	2.5791	3.0235	2.15677	2.87847	3.10697	3.36238	2.40426	2.39918	3.21054	2.99123
	Ⅲ	2.26295	2.00345	2.68765	2.56673	2.03971	2.08899	2.43962	2.22022	2.39591	2.4676	2.40754	2.26391	1.76429	2.59122	3.02735	2.12889	2.85436	3.11112	3.40217	2.34818	2.38708	3.20639	3.01936
	Mean	2.07615	2.10199	2.76211	2.43768	2.1355	2.21713	2.40245	2.26441	2.44386	2.44641	2.40753	2.36248	1.73881	2.58589	3.02069	2.14488	2.86235	3.10313	3.40216	2.37749	2.39241	3.19573	3.00337
	Standard	0.23193	0.114283	0.0937181	0.122386	0.212663	0.116574	0.0645005	0.0564048	0.0575516	0.0187947	0.0158631	0.0876474	0.0372835	0.0061887	0.00842854	0.0143849	0.013963	0.0104566	0.0397846	0.0281247	0.00618168	0.02215	0.0144516

## Sheet:  GA3 
Medium		﹣5℃					﹣3℃					0℃					3℃				5℃
	Repetition	25d	50d	81d	104d	125d	25d	50d	81d	104d	125d	14d	21d	25d	30d	45d	14d	21d	30d	45d	14d	21d	30d	45d
Weight (g)	Ⅰ	2.0011	2.078	2.0213	2.0788	2.0367	2.032	2.0768	2.0059	2.0277	2.0694	2.0035	2.032	2.0768	2.0129	2.0245	2.0284	2.0787	2.1284	2.0549	2.0314	2.0481	2.0244	2.0644
	Ⅱ	2.0013	2.0776	2.0211	2.0783	2.0364	2.0322	2.0766	2.0055	2.0275	2.0691	2.0036	2.0322	2.0755	2.0127	2.0243	2.028	2.0785	2.128	2.0553	2.0316	2.0482	2.024	2.0646
	Ⅲ	2.0008	2.0778	2.0215	2.0785	2.0369	2.0318	2.077	2.0057	2.0279	2.0693	2.0034	2.0321	2.076	2.0128	2.0244	2.0282	2.0786	2.1282	2.0551	2.0315	2.0483	2.0242	2.0645
Volumn (mL)		5	5	5	5	5	5	5	5	5	5	5	5	5	5	5	5	5	5	5	5	5	5	5
Peak area	Ⅰ	1.947	1.848	1.285	1.181	0.994	1.809	1.697	1.511	1.414	1.067	2.786	3.032	4.049	4.214	4.553	2.941	3.713	3.954	4.552	3.538	4.319	4.329	5.782
	Ⅱ	1.792	1.844	1.261	1.043	1.057	1.87	1.703	1.416	1.411	0.95	2.632	3.036	3.993	4.543	4.509	2.889	3.646	4.38	4.619	3.524	4.224	4.259	5.805
	Ⅲ	2.131	1.876	1.222	1.107	1.101	1.806	1.697	1.506	1.409	0.968	2.496	2.985	4.108	4.514	4.714	2.507	3.542	4.405	4.624	3.489	4.051	4.476	5.703
GA3 content (mg/g FW)	Ⅰ	0.037343	0.0343548	0.0259276	0.0235237	0.0209143	0.0344854	0.0319232	0.0299253	0.0279907	0.0217732	0.0514172	0.0547778	0.0701064	0.0750957	0.080311	0.0533624	0.0645926	0.0669019	0.0791065	0.0631921	0.0755335	0.0765844	0.0988307
	Ⅱ	0.034728	0.0342965	0.0255298	0.0212906	0.0219605	0.035494	0.0320237	0.0283342	0.0279436	0.0198699	0.0488232	0.0548387	0.0692407	0.0806144	0.0795861	0.0525084	0.063512	0.073664	0.0801902	0.0629535	0.0739661	0.0754335	0.0991967
	Ⅲ	0.0404492	0.0348124	0.0248743	0.0223267	0.0226834	0.034439	0.0319202	0.0298442	0.0279048	0.0201612	0.0465393	0.0539953	0.0710917	0.0801246	0.0829964	0.0461531	0.061822	0.0740531	0.08028	0.0623758	0.0711148	0.0790404	0.0975357
	Mean	0.0375067	0.0344879	0.0254439	0.0223803	0.0218527	0.0348062	0.0319557	0.0293679	0.0279463	0.0206014	0.0489266	0.0545372	0.0701463	0.0786115	0.0809645	0.0506746	0.0633089	0.0715397	0.0798589	0.0628405	0.0735381	0.0770194	0.098521
	Standard	0.0028641	0.000282561	0.000531883	0.0011175	0.000889432	0.000596178	5.89254e-05	0.000896152	4.30126e-05	0.00102518	0.00244058	0.000470363	0.000926139	0.00305465	0.00179659	0.00393897	0.00139641	0.00402109	0.000653144	0.000419748	0.00224022	0.0018424	0.000872702

## Sheet: IAA
Medium		﹣5℃					﹣3℃					0℃					3℃				5℃
	Repetition	25d	50d	81d	104d	125d	25d	50d	81d	104d	125d	14d	21d	25d	30d	45d	14d	21d	30d	45d	14d	21d	30d	45d
Weight (g)	Ⅰ	2.0011	2.078	2.0213	2.0788	2.0367	2.032	2.0768	2.0059	2.0277	2.0694	2.0035	2.032	2.0768	2.0129	2.0245	2.0284	2.0787	2.1284	2.0549	2.0314	2.0481	2.0244	2.0644
	Ⅱ	2.0013	2.0776	2.0211	2.0783	2.0364	2.0322	2.0766	2.0055	2.0275	2.0691	2.0036	2.0322	2.0755	2.0127	2.0243	2.028	2.0785	2.128	2.0553	2.0316	2.0482	2.024	2.0646
	Ⅲ	2.0008	2.0778	2.0215	2.0785	2.0369	2.0318	2.077	2.0057	2.0279	2.0693	2.0034	2.0321	2.076	2.0128	2.0244	2.0282	2.0786	2.1282	2.0551	2.0315	2.0483	2.0242	2.0645
Volumn (mL)		5	5	5	5	5	5	5	5	5	5	5	5	5	5	5	5	5	5	5	5	5	5	5
Peak area	Ⅰ	10.693	9.705	8.538	8.361	7.867	9.321	8.975	8.397	6.209	6.266	8.96	8.638	9.508	11.342	12.595	7.204	7.842	10.027	12.632	6.957	6.986	11.075	13.274
	Ⅱ	10.721	9.248	8.468	8.483	7.74	9.197	8.967	8.46	6.215	6.325	8.984	9.26	9.768	10.465	12.59	7.468	7.597	9.892	12.868	6.352	7.084	10.698	12.473
	Ⅲ	10.631	9.622	8.831	8.669	7.779	9.339	8.733	8.447	6.465	6.14	8.963	9.325	9.866	10.578	12.74	7.149	7.024	9.783	12.395	6.683	7.008	11.2	13.468
IAA content (mg/g FW)	Ⅰ	0.00752465	0.00652849	0.00584011	0.00555004	0.00529864	0.00639102	0.00600167	0.00577884	0.00408788	0.00404708	0.00620994	0.00588364	0.00638907	0.00796724	0.00885584	0.00482693	0.00517343	0.00660226	0.00875201	0.00463626	0.00461983	0.00772289	0.00918117
	Ⅱ	0.00754502	0.00619771	0.00578841	0.00563999	0.00520528	0.00629828	0.00599643	0.00582741	0.00409275	0.00409071	0.00622771	0.00634508	0.00658217	0.00731029	0.00885299	0.00502438	0.00499599	0.00650774	0.00892363	0.00418628	0.00469183	0.00744325	0.00859464
	Ⅲ	0.00747901	0.00646882	0.00605832	0.00577453	0.0052329	0.00640502	0.00582521	0.00581704	0.00427803	0.00395536	0.00621251	0.00639368	0.00665184	0.00739467	0.0089644	0.00478647	0.00457963	0.00642982	0.00857708	0.00443243	0.00463559	0.00781687	0.00932257
	Mean	0.00751623	0.00639834	0.00589561	0.00565485	0.00524561	0.00636477	0.0059411	0.00580776	0.00415288	0.00403105	0.00621672	0.00620747	0.00654103	0.0075574	0.00889108	0.00487926	0.00491635	0.00651327	0.00875091	0.00441832	0.00464908	0.007661	0.00903279
	Standard	3.38045e-05	0.000176294	0.000143262	0.000112978	4.79586e-05	5.80067e-05	0.000100399	2.55811e-05	0.000108407	6.90831e-05	9.60476e-06	0.00028149	0.000136131	0.000357429	6.35153e-05	0.000127298	0.000304802	8.63555e-05	0.000173281	0.00022532	3.78484e-05	0.000194346	0.000385982

[truncated: 1 more sheets: ABA]
